# Supplementary material for: Efficacy of Therapeutic Aquatic Exercise vs Physical Therapy Modalities for Patients With Chronic Low Back Pain: A Randomized Clinical Trial
Source: PubMed Central journal article supplement (PMC8742191; doi:10.1001/jamanetworkopen.2021.42069), 2022-01-07
Supplement: jamanetwopen-e2142069-s001.pdf [file jamanetwopen-e2142069-s001.pdf]

1 **Supplement 1 Protocol of therapeutic aquatic exercise program and**

2 **measurements**

3

4 Effects of 12-Week Therapeutic Aquatic Exercise for Patients with Chronic Low Back

5 Pain: Protocol of a Single-blind Randomized Controlled Trial

6 **Introduction**

7 Chronic low back pain (CLBP), a symptom rather than a disease, is commonly

8 located between the lower rib and the buttocks wrinkles.<sup>1</sup> Similar to other symptoms,

9 CLBP results from variable factors, and the specific underlying cause can be rarely

10 identified.<sup>2</sup> People of all ages may suffer from CLBP, it is uncommon in the first

11 decade of life; however, the prevalence increases steadily during adolescence and

12 peaks in midlife.<sup>1</sup> The lifetime morbidity of CLBP worldwide is up to 84%.<sup>3</sup> CLBP

13 was once seen as a short-term condition but is now considered as a long-term

14 condition because of its frequent recurrent episodes. Approximately 33% of people

15 experience relapse within 1 year after recovery.<sup>1,3</sup> Given its high prevalence and

16 chronicity, CLBP is the leading cause of disability across the world, causing more

17 disabilities than any other chronic diseases do.<sup>1,4,5</sup> From 2013 to 2016, CLBP

18 consistently remained the top six most costly global health issues.<sup>6-8</sup> Consultation

19 about back pain accounts for 7% of all general practitioner consultations,<sup>3</sup> and people

20 with CLBP miss 4.1 million working days in 1 year.<sup>9</sup> Undoubtedly, low back pain is

21 now a substantial public health challenge worldwide.

22

23 Drug therapy is one of the most commonly used treatments for CLBP, but side effects  
24 due to medication are inevitable.<sup>10,11</sup> Considering that the condition of most patients  
25 with CLBP improves naturally regardless of treatment, nonpharmacologic and  
26 nonsurgical methods should be the first-line choice.<sup>9,12</sup> Clinical applications in  
27 patients with CLBP, physical therapy modalities (PTMs), such as transcutaneous  
28 electrical nerve stimulation (TENS) and far-infrared (FIR) irradiation therapy, is  
29 regard as a relatively safe, convenience and non-invasive option.<sup>13,14</sup> Nowadays,  
30 exercise therapy is widely recommended as a valid way for pain relief and functional  
31 improvements by most clinical guidelines.<sup>3-5,9</sup> Among the numerous exercise  
32 therapies, therapeutic aquatic exercise (TAE) is often prescribed by clinical doctors  
33 and is becoming increasingly popular for alleviating pain and facilitating function.<sup>15,16</sup>  
34  
35 TAE refers to water-based treatments or exercise. With various properties, including  
36 its buoyancy pressure, density, thermal capacity, and conductivity,<sup>15</sup> water is an ideal  
37 environment to conduct an exercise program. TAE reduces the stress on intervertebral  
38 disk and intervertebral joint with the help of hydrostatic buoyancy; enables a large  
39 range of movement by supporting the body weight; improves lumbar muscle tone via  
40 its natural resistance; offers gentle manipulation on back because of turbulence and  
41 wave propagation; adjusts the velocity of exercise by changing the depth of water;  
42 moreover, dynamic water environment improves microcirculation, enhances balance  
43 and coordination, facilitates relaxation, and decreases the contracture.<sup>16-20</sup>

44

45 Some studies have shown that TAE aquatic exercise can be a safe and effective  
46 treatment approach for CLBP.<sup>20-23</sup> Whether combined with other therapies or used  
47 alone, TAE is both beneficial to pain reduction and functional improvement.<sup>24,25</sup>  
48 Although the effect of aquatic therapy on patients with CLBP has been explored,<sup>25,26</sup>  
49 the duration of most previous studies was short and did not include a long follow-up  
50 period. Both as a kind of non-invasive treatment, there are no studies investigating  
51 whether TAE could produce more benefits than PTMs for people with CLBP.  
52 Therefore, we will perform a single-blind randomized controlled trial (RCT) with  
53 long follow-up to observe the effects of TAE on people with CLBP versus PTMs.

54

## 55 **Methods/Design**

### 56 **Research goals and hypotheses**

57 We will design an RCT to conclude TAE and PTMs for people with low back pain to  
58 see:

59 Goal 1: whether TAE compared favorably with PTM for people with CLBP;

60 hypotheses for Aim 1: Patients in TAE group will receive more benefits in pain  
61 relieve and functional improvement than subjects in the PTMs group. There will be  
62 significant differences between two groups.

63 Goal 2: whether TAE yields long-term effects.

64 hypotheses for Aim 2: TAE will create a long-term effect on people with CLBP while  
65 PTMs will not. There will be significant differences between two groups during the  
66 fellow-up period.

67

68 **Study design**

69 This study is a 3-month single-blind RCT with a 12-month follow-up (Trial  
70 registration: ChiCTR1800016396). All included participants will be randomly  
71 allocated into either the TAE group or the PTMs group. The interventions of two  
72 groups will be carried out in Shangti indoor constant temperature swimming pool and  
73 Shanghai Shangti Orthopedics Hospital respectively. Experienced physiotherapists  
74 will carry out the measurements at baseline, after the 3-month intervention, at  
75 6-month follow-up, and at 12-month follow-up from the beginning to determine  
76 whether short-term effects and long-term impacts will be achieved.

77

78 **Participant selection**

79 Subjects who meet all the inclusion criteria and do not have any of the exclusion  
80 criteria will be eligible for enrollment. Before undergoing other tests, participants will  
81 be examined via a questionnaire with the following entries: basic information (e.g.,  
82 age, sex, height and weight), physical activity, medical history, medical expenditure,  
83 back pain duration, back pain intensity (at present, over the last week, the worst pain,  
84 and the average pain), and self-rated back function.

85

86 **Inclusion criteria are as follows:**

87 1. Aged ranged from 18 to 65; 2. Pain, muscle tension or stiffness between the buttock  
88 band and the rib arch; may also have lower limb pain; 3. Pain intensity (when the

89 most painful)  $\geq 3$  on the numeric rating scale (NRS); 4. CLBP lasting at least 3  
90 months; 5. Voluntary participation in the trial and with written informed consent; 6.  
91 Accepted randomization. Subjects will be included if they meet all criteria above.

92

93 **Exclusion criteria are as follows:**

94 1. mental illness or cognitive impairment (Mini-mental State Examination,  $<24$ ); 2.  
95 Specific lumbago, such as fracture, spinal stenosis, tumour infection and spinal  
96 structural abnormalities; 3. Lumbar dysfunction or pain caused by other diseases; 4.  
97 Complex back problems, such as spinal surgery; 5. Patients with severe and unstable  
98 cardiovascular, renal or liver diseases; 6. Received a regular low back pain exercise  
99 intervention during the past 6 months; 7. Pregnant or lactating; 8. Chlorine allergy; 9.  
100 Water-related anxiety or unable to adapt to an aquatic environment; 10. Urinary or  
101 faecalis incontinence; 11. Contagious skin diseases, ulcers or open wounds; 12.  
102 Medications that alter sensory perception. Subjects will be excluded if they have any  
103 of these criteria.

104

105 **Withdrawal criteria**

106 1. Patients lose interest; 2. Patients' schedule conflict with the experimental  
107 arrangement; 3. Patients develop serious conditions, such as stroke; 4. Patients  
108 experience a side effect due to TAE or PTMs.

109

110 **Ethical considerations**

111 Before the measurement will implemented, informed consent will be signed by all  
112 participants interested in the study. The project is ratified by the ethics committee of  
113 the Shanghai University of Sport (number 2018042), Shanghai, China.

114

#### 115 **Randomization and blinding**

116 Randomization in a 1:1 ratio will be performed according to a computer-generated  
117 scheme, and participants will be assigned into the control group (PTMs) or the  
118 experimental group (TAE). A researcher who carries out the randomization with  
119 sealed and opaque envelopes will remain separated from the intervention team.

120 A group of assessors will be responsible for each block of the measurement, but they  
121 are not aware of the group assignments and remain distant from the invention. The  
122 instructors are masked to the study's hypothesis and experimental purpose. To be  
123 ignorant of grouping when receiving a behavior-related treatment at the mean time is  
124 impossible for participants.

125

126

#### 127 **Interventions**

128 The intervention sessions will be carried out by a group of qualified physiotherapists  
129 who will not take part in the data collection. Both programs will last 12 weeks and  
130 will be administered twice per week for a total of 24 treatment sessions. The  
131 participants will be encouraged to complete the intervention as designed, and the  
132 adherence rate is expected to be at least 75%. Attendance frequency, medication

133 changes, and adverse events during the sessions and after treatment will be filled out  
134 in a daily record form. Once a participant absents from the intervention sessions, he or  
135 she will be contacted immediately to determine the reason. Participants who withdraw  
136 halfway, fail to attend the evaluations, or miss more than 2 weeks will be regarded as  
137 drop-outs <sup>27</sup>.

138

### 139 **TAE group**

140 The temperature will be customized at 30 °C of water and 27.5 °C of environment to  
141 elicit the same heart response both in water and in air. The entire intervention will be  
142 completed in a swimming pool with a dimension of 20 m × 6 m and a depth of  
143 1.3–1.5 m. To ensure that all of the participants will be submerged at their xiphoid  
144 bone level, some aquatic steps will be placed underwater as auxiliary forces.

145 The TAE protocol will be designed by the researcher in accordance with available  
146 scientific evidence. During the exercise, the participants will receive verbal, tactile,  
147 and visual information to correct their movements and ensure that the lumbar spine  
148 remains in a neutral position while standing. Thus, excessive loading on the spine will  
149 be avoided, and trunk muscles will be activated. The target exercise intensity will  
150 depend on the subject's self-rated score of Rating of Perceived Exertion of  
151 approximately 13 in accordance with 60%–80% of maximum heart rate.<sup>28</sup>

152 The participants will start the exercise with an active warm-up for 10min to enhance  
153 neuromuscular activation. In the succeeding 40 min, they will perform an aquatic  
154 session, including abdominal bracing, vertical downward press, lateral downward

155 press, slant downward press, straight leg raising, treading water, and deep water  
156 running. Finally, the participants will have a cool-down period for 10min. Table 1  
157 shows the full description of the protocol.

158 All subjects will participate in the exercise in a group of 8–9 people. Weeks 1 and 2  
159 are the learning period for subjects to become familiar with the actions. Then, the  
160 intensity of movements will be adjusted by changing the kickboard sizes. Thus, the  
161 neuromuscular stimulation will be maximized, and the subjects' interest will also be  
162 maintained.

163

#### 164 **PTMs group**

165 The subjects in the control group received TENS and IR irradiation therapy. Both  
166 modalities were focused on pain points, and each had a duration of 30 min.

167 TENS (model KD-2A, Beijing Yiyang Kangda Medical Instrument Co., Ltd., China)  
168 sends a bidirectional asymmetrical square wave at a frequency of 2 Hz to 160 Hz and  
169 a pulse width of 20  $\mu$ s to 500  $\mu$ s. The participants received TENS at a current  
170 frequency of 120 Hz and a pulse width of 100  $\mu$ s. Disposable surface electrodes with  
171 dimensions of 50 mm  $\times$  50 mm were placed on the pain point, and pulse intensity was  
172 adjusted to produce a comfortable tingling sensation.<sup>29,30</sup>

173 The IR apparatus (model LY-607A Foshan Lingyuan Medical Technology Co., Ltd.,  
174 China) was placed with its lamp located 50 cm to 75 cm above the exposed area. The  
175 lamp direction was adjusted to ensure that radiation struck the surface at or near a  
176 right angle such that maximum penetration was achieved.<sup>31,32</sup> At 3–5 min after the



177 instrument was energised, the patient was asked whether their sense of warmth was  
178 appropriate, and the lamp height was adjusted to prevent scalding.

179

180

### 181 **Outcome measures**

182 Clinical outcomes are classified as primary outcomes and secondary outcomes,  
183 including pain intensity, function of low back pain, and adverse events.

184

### 185 **Primary outcomes**

186 1. Pain degree was measured with the NRS, which consisted of 11 numbers from 0 to  
187 10. The scores are set as follows: 0 as painless, 1–3 as mild pain, 4–6 as moderate  
188 pain and 7–10 as strong and unbearable pain. The subjects reported the pain intensity  
189 they feel at the present and that they experienced last week (slightest, average and  
190 most serious).<sup>33</sup>

191 2. Back function was assessed with the Roland Morris Disability Questionnaire  
192 (RMDQ), which contains 24 items that are closely related to the daily life activities of  
193 patients with CLBP.<sup>34</sup> The scores are as follows: 1 for checking ‘YES’ and 0 for  
194 checking ‘NO’. The final score varies from 0 to 24. Higher scores are associated with  
195 more severe disability.<sup>35</sup>

196

### 197 **Secondary outcomes**

198 1. Quality of life was measured with the Short-form (36) Health Survey (SF-36).

199 SF-36 consists of eight scales, and a high score indicates low disability. The SF-36  
200 questionnaire is reliable and relatively stable considering that its overall Cronbach's  $\alpha$   
201 coefficient = 0.791 and  $r = 0.778$ .<sup>36</sup>

202 2. Anxiety state was measured with the self-rating anxiety scale (SAS). SAS is a  
203 20-item self-reported assessment device.<sup>37</sup> Each question is based on the following  
204 responses: 'rarely', 'sometimes', 'usually' and 'most of the time.' A respondent should  
205 choose the appropriate statement on the basis of his condition within the past 1 or 2  
206 weeks. The total raw score may vary from 20 to 80, a high score indicates high  
207 anxiety levels.<sup>37</sup>

208 3. Depression state was measured with the Zung Self-Rating Depression Scale (SDS).  
209 The SDS is a 20-item self-reported questionnaire covering affective, psychological  
210 and somatic symptoms associated with depression. Each item is scored on a Likert  
211 scale that ranges from 1 to 4. Total scores range from 20 to 80, wherein 20–44 is  
212 normal, 45–59 is mildly depressed, 60–69 is moderately depressed and >70 is  
213 severely depressed.

214 4. Sleep quality was measured with the Pittsburgh Sleep Quality Index (PSQI). The  
215 PSQI is a self-reported scale that is used to assess sleep quality over a 1-month period.  
216 The PSQI consists of 19 individual items and comprises 7 components that are used  
217 evaluate sleep quality from several different aspects, such as sleep latency, sleep  
218 duration, habitual sleep efficiency, sleep disturbances, sleeping medication use and  
219 daytime dysfunction. The global score of PSQI ranges from 0 to 21, wherein high  
220 values indicate poor sleep quality.<sup>38</sup>

221 5. The Pain Anxiety Symptoms Scale (PASS) was used to evaluate pain-induced  
222 avoidance, fear, cognitive anxiety and physiological anxiety. The PASS contains 20  
223 items. Each item is divided into 6 grades: 'never', 'occasionally', 'sometimes', 'often',  
224 'almost always' and 'always'. The total score ranges from 0 to 100. High scores are  
225 indicative of severe pain and anxiety symptoms. The internal consistency of the scale  
226 is good with Cronbach  $\alpha = 0.92$  and test–retest reliability intraclass correlation  
227 coefficient (ICC) = 0.90.<sup>39</sup>

228 6. Kinaesiophobia was measured with the Tampa Scale for Kinaesiophobia (TSK).  
229 The 17-item version of the TSK is used to assess the fear of activity or (re)injury  
230 resulting from pain.<sup>40</sup> It is rated by using a 4-point Likert scale that varies from  
231 'strongly disagree' to 'strongly agree'. The total score of this scale varies from 17 to  
232 68, wherein a high score reflects high levels of kinaesthetic phobia.<sup>40</sup> The TSK has  
233 been confirmed to have acceptable reliability (ICC = 0.86) and excellent validity  
234 (Cronbach's  $\alpha = 0.74$ ).<sup>41</sup>

235 7. The Fear Avoidance Beliefs Questionnaire (FABQ) was used to evaluate fear  
236 avoidance belief. The FABQ consists of 16 items, including 2 subscales that are used  
237 to evaluate the effects of fear avoidance beliefs on physical activity (items 1–5) and  
238 work (items 6–16). Each item is scored from 0 to 6. These scores correspond to  
239 strongly disagree, very disagree, disagree, uncertainty, agree, very agree and strongly  
240 agree. The total score of this scale ranges from 0 to 96. High scores indicate strong  
241 fear avoidance belief.

242 8. Minimal clinically important difference (MCID) was used to determine whether the

243 treatment produces a significant clinical improvement in pain (NRS) and function  
244 (RMDQ). The definition of MCID is ‘the smallest difference or change in a clinical  
245 outcome that is perceived as beneficial to patient’s medical management, assuming no  
246 excessive side effects and costs’.<sup>42</sup> MCID is an evidence-based assessment tool for  
247 behavioural interventions across an entire procedure.<sup>43,44</sup> A reduction of 2 or more in  
248 the NRS indicates positive clinical change.<sup>45</sup> And several studies have recommended  
249 that the MCID for RMDQ-24 is the absolute cut-off of 5 points.<sup>44,45</sup>

250 9. The participants’ overall assessment of the treatment was measured on the basis of  
251 the global perceived effect (GPE). The GPE scale requires patients to rate how much  
252 they have improved or deteriorated since they received the treatment. The use of this  
253 scale is widely advocated in pain research because it is easy and quick to understand  
254 and score, and its results are important to patients.<sup>46</sup> The most meaningful changes  
255 can be observed in patients answering the scale at a predefined time point. The GPE  
256 scale has excellent reproducibility (ICC = 0.90–0.99), and its correlation with  
257 disability ( $r = 0.40–0.74$ ) is strong.<sup>47</sup>

258 10. Adverse events were collected from participants’ daily record forms. All pain  
259 (LBP or other pain) related to intervention or unrelated to intervention occurring  
260 during the research duration was considered.

261 11. The participants’ recommendation levels on the intervention that they received  
262 were classified as highly recommended, recommend, unclear, not recommended and  
263 strongly deprecated.

264

265 **Participant timeline**

266 The participants will be asked to complete the questionnaires personally at baseline,  
267 after 3 months of treatment, at 6-month follow-up, and at 12-month follow-up. During  
268 the follow-up period, the experimental team will contact the participants either via  
269 Wechat or phone regularly so that the data at the 6- and 12-month time points can be  
270 collected. Table 2 displays the items of the questionnaire and the measurement time  
271 points.

272

273 **Sample size calculation**

274 Sample size was calculated by G\*power 3.1.9 based on the following conditions.

275 According to Costantino's trial, the subjects of the two groups received 12 weeks of  
276 aquatic exercise and back school program respectively. The effect size was calculated  
277 to be 0.35 by using the RMDQ score of the experimental group (mean = 5.37, SD =  
278 1.82) and the control group (mean = 6.11, SD = 2.36) during the 3-month follow-up.<sup>48</sup>

279 The two groups were measured 4 times by using a mixed design of repeated measures  
280 analysis of variance. Considering that  $\alpha = 0.05$ , power  $(1-\beta) = 0.95$ , Corr amongst rep  
281 measures = 0.5, the total sample size was 70. Considering the possibility of a 20%  
282 missing rate, the minimum sample size was 88. According to the calculation, 100  
283 subjects will be expected to be recruited, and 50 subjects will be included in each  
284 group.

285

286 **Statistical analysis**

287 Data will be collected and analyzed via SPSS 20.0 and Microsoft 2016. Considering  
288 that someone may drop out midway, all outcomes should be conducted by  
289 intention-to-treat analysis and per-protocol analysis. For baseline variables, we will  
290 detect the categorical variables (e.g. gender, education levels and occupation) with  
291 chi-square test and analyze the continuous variables (e.g. age, height, weight, BMI,  
292 and pain intensity) with independent t-test or Mann–Whitney U test to compare the  
293 statistical significance between the TAE group and the PTMs group. The results of  
294 descriptive statistics will be presented as mean  $\pm$  standard deviation.

295 The experimental results were compared through adjusted two-way repeated measures  
296 ANOVA (group  $\times$  time). The adjustment factors included gender, age, BMI, physical  
297 activity, LBP duration, NRS of the most severe LBP, medication, and smoking history.  
298 A chi-square test was conducted to compare the proportion of participants in each  
299 group who met the MCID for pain and function at postintervention. Although the  
300 MCID for RMDQ and NRS remains controversial, values of 5.0 and 2.0 are  
301 considered reasonable and commonly used. The  $\chi^2$  test was also applied to determine  
302 the difference between the 2 groups for the proportion of participants reporting GPE,  
303 adverse events and treatment recommendations. The effect sizes were presented to  
304 measure the strength of any outcome indicators, where  $0.2 \leq$  Cohen's  $d < 0.5$  means a  
305 'small' effect size,  $0.5 \leq$  Cohen's  $d < 0.8$  indicates a 'medium' effect size and  
306 Cohen's  $d \geq 0.8$  reflects a 'large' effect size.

307

## 308 **Discussion**

309 With various properties of water, TAE should be an acceptable and effective  
310 treatment for CLBP. In TAE usually performed in a group, creating high compliance  
311 and great effects on pain, people with CLBP interact with others with similar  
312 problems and receive peer support.<sup>9,11,49</sup> TAE is a proactive and enjoyable treatment  
313 to convey the positive health concept naturally,<sup>50</sup> which will cause long-term effects  
314 by avoiding unhealthy behaviors, such as absence from work and prolonged rest.<sup>11,51</sup>  
315 Compared to PTMs, TAE can be carried out by patients themselves, which will cut  
316 down the medical expenditure to some extent.  
317 To the best of our knowledge, this work is the first to compare the effect between  
318 TAE and PTMs on patients with CLBP. Thus, our study may also have the potential  
319 to optimize the strength of the water exercise, and our findings may provide broad  
320 functional and psychological benefits to practical applications.

321

### 322 **Strengths and limitations**

323 First, the research duration of most previous studies typically ranged from several  
324 weeks to 2 months.<sup>22,23,52-54</sup> This study will include an intervention period of 3 months  
325 and a follow-up period (without intervention) of 3 and 9 months, making the entire  
326 term of 1 year. Second, our study will offer the same attention to all participants by  
327 designing the two programs with equal time, thereby reducing other biases compared  
328 with former studies.<sup>55</sup> Third, we will add some psychological scales and  
329 lifestyle-related issues into our measurement. Thus, the CLBP will be accessed in a  
330 multi-tiered system.

331 Nevertheless, this method is not the perfect protocol. On the one hand, recall bias in  
332 questionnaire responses is inevitable, but we do not have enough data to show this  
333 influence. On the other hand, included people may have CLBP with different  
334 durations and degrees. Controlling the disease progression that affects individual  
335 physical fitness is difficult.

336 In conclusion, this trial aims to investigate the effect of TAE on people with CLBP  
337 and determine whether TAE elicits better results thanPTMs. Our findings will provide  
338 patients with an enjoyable and effective way to recovery, lessen the medical burden of  
339 CLBP, and change the public health and prevention strategies worldwide.<sup>55,56</sup>

340  
341

## 342 **References**

- 343 1. Hartvigsen J, Hancock MJ, Kongsted A, et al. What low back pain is and why we need to pay  
344 attention. *Lancet (London, England)*. 2018;391(10137):2356-2367.
- 345 2. Maher C, Underwood M, Buchbinder R. Non-specific low back pain. *Lancet (London,*  
346 *England)*. 2017;389(10070):736-747.
- 347 3. Bernstein IA, Malik Q, Carville S, Ward S. Low back pain and sciatica: summary of NICE  
348 guidance. *BMJ (Clinical research ed)*. 2017;356:i6748.
- 349 4. National Guideline C. National Institute for Health and Care Excellence: Clinical Guidelines.  
350 *Low Back Pain and Sciatica in Over 16s: Assessment and Management*. London: National  
351 Institute for Health and Care Excellence (UK) NICE, 2016(59).
- 352 5. Chou R, Deyo R, Friedly J, et al. Nonpharmacologic Therapies for Low Back Pain: A  
353 Systematic Review for an American College of Physicians Clinical Practice Guideline. *Ann*  
354 *Intern Med*. 2017;166(7):493-505.
- 355 6. Collaborators. GDaIaP. Global, regional, and national incidence, prevalence, and years lived  
356 with disability for 328 diseases and injuries for 195 countries, 1990-2016: a systematic  
357 analysis for the Global Burden of Disease Study 2016. *Lancet (London, England)*.  
358 2017;390(10100):1211-1259.
- 359 7. Collaborators. GBoDS. Global, regional, and national incidence, prevalence, and years lived  
360 with disability for 301 acute and chronic diseases and injuries in 188 countries, 1990-2013: a  
361 systematic analysis for the Global Burden of Disease Study 2013. *Lancet (London, England)*.  
362 2015;386(9995):743-800.
- 363 8. Collaborators. GDaIaP. Global, regional, and national incidence, prevalence, and years lived  
364 with disability for 310 diseases and injuries, 1990-2015: a systematic analysis for the Global  
365 Burden of Disease Study 2015. *Lancet (London, England)*. 2016;388(10053):1545-1602.



- 366 9. Qaseem A, Wilt TJ, McLean RM, Forciea MA. Noninvasive Treatments for Acute, Subacute,  
367 and Chronic Low Back Pain: A Clinical Practice Guideline From the American College of  
368 Physicians. *Ann Intern Med.* 2017;166(7):514-530.
- 369 10. Clark S, Horton R. Low back pain: a major global challenge. *Lancet (London, England).*  
370 2018;391(10137):2302.
- 371 11. Buchbinder R, van Tulder M, Oberg B, et al. Low back pain: a call for action. *Lancet*  
372 *(London, England).* 2018;391(10137):2384-2388.
- 373 12. Wenger HC, Cifu AS. Treatment of Low Back Pain. *Jama.* 2017;318(8):743-744.
- 374 13. Khadilkar A, Odebiyi DO, Brosseau L, Wells GA. Transcutaneous electrical nerve stimulation  
375 (TENS) versus placebo for chronic low-back pain. *The Cochrane database of systematic*  
376 *reviews.* 2008(4):Cd003008.
- 377 14. Lai CH, Leung TK, Peng CW, et al. Effects of far-infrared irradiation on myofascial neck  
378 pain: a randomized, double-blind, placebo-controlled pilot study. *J Altern Complement Med.*  
379 2014;20(2):123-129.
- 380 15. Lahart IM, Metsios GS. Chronic Physiological Effects of Swim Training Interventions in  
381 Non-Elite Swimmers: A Systematic Review and Meta-Analysis. *Sports medicine (Auckland,*  
382 *NZ).* 2018;48(2):337-359.
- 383 16. Baena-Beato PA, Arroyo-Morales M, Delgado-Fernandez M, Gatto-Cardia MC, Artero EG.  
384 Effects of different frequencies (2-3 days/week) of aquatic therapy program in adults with  
385 chronic low back pain. A non-randomized comparison trial. *Pain medicine (Malden, Mass).*  
386 2013;14(1):145-158.
- 387 17. Dundar U, Solak O, Yigit I, Evcik D, Kavuncu V. Clinical effectiveness of aquatic exercise to  
388 treat chronic low back pain: a randomized controlled trial. *Spine.* 2009;34(14):1436-1440.
- 389 18. Rivas Neira S, Pasqual Marques A, Pegito Perez I, Fernandez Cervantes R, Vivas Costa J.  
390 Effectiveness of Aquatic Therapy vs Land-based Therapy for Balance and Pain in Women  
391 with Fibromyalgia: a study protocol for a randomised controlled trial. *BMC musculoskeletal*  
392 *disorders.* 2017;18(1):22.
- 393 19. Bressel E, Dolny DG, Gibbons M. Trunk muscle activity during exercises performed on land  
394 and in water. *Medicine and science in sports and exercise.* 2011;43(10):1927-1932.
- 395 20. Carroll LM, Volpe D, Morris ME, Saunders J, Clifford AM. Aquatic Exercise Therapy for  
396 People With Parkinson Disease: A Randomized Controlled Trial. *Archives of physical*  
397 *medicine and rehabilitation.* 2017;98(4):631-638.
- 398 21. Shi Z, Zhou H, Lu L, et al. Aquatic Exercises in the Treatment of Low Back Pain: A  
399 Systematic Review of the Literature and Meta-Analysis of Eight Studies. *American journal of*  
400 *physical medicine & rehabilitation.* 2018;97(2):116-122.
- 401 22. Barker AL, Talevski J, Morello RT, Nolan GA, De Silva RD, Briggs AM. Jumping into the  
402 deep-end: results from a pilot impact evaluation of a community-based aquatic exercise  
403 program. *Clinical rheumatology.* 2016;35(6):1593-1601.
- 404 23. Nguyen C, Boutron I, Rein C, et al. Intensive spa and exercise therapy program for returning  
405 to work for low back pain patients: a randomized controlled trial. *Scientific reports.*  
406 2017;7(1):17956.
- 407 24. Karagulle M, Karagulle MZ. Effectiveness of balneotherapy and spa therapy for the treatment  
408 of chronic low back pain: a review on latest evidence. *Clinical rheumatology.*  
409 2015;34(2):207-214.

- 410 25. Cuesta-Vargas AI, Adams N, Salazar JA, Belles A, Hazanas S, Arroyo-Morales M. Deep water  
411 running and general practice in primary care for non-specific low back pain versus general  
412 practice alone: randomized controlled trial. *Clinical rheumatology*. 2012;31(7):1073-1078.
- 413 26. Cuesta-Vargas AI, White M, Gonzalez-Sanchez M, Kuisma R. The optimal frequency of  
414 aquatic physiotherapy for individuals with chronic musculoskeletal pain: a randomised  
415 controlled trial. *Disability and rehabilitation*. 2015;37(4):311-318.
- 416 27. Li F, Harmer P, Fitzgerald K, et al. Tai chi and postural stability in patients with Parkinson's  
417 disease. *The New England journal of medicine*. 2012;366(6):511-519.
- 418 28. Wallace LK, Slattery KM, Coutts AJ. The ecological validity and application of the  
419 session-RPE method for quantifying training loads in swimming. *Journal of strength and  
420 conditioning research*. 2009;23(1):33-38.
- 421 29. Elserty N, Kattabei O, Elhafez H. Effect of Fixed Versus Adjusted Transcutaneous Electrical  
422 Nerve Stimulation Amplitude on Chronic Mechanical Low Back Pain. *J Altern Complement  
423 Med*. 2016;22(7):557-562.
- 424 30. Khadilkar A, Odebiyi DO, Brosseau L, Wells GA. Transcutaneous electrical nerve stimulation  
425 (TENS) versus placebo for chronic low-back pain. *The Cochrane database of systematic  
426 reviews*. 2008(4):CD003008.
- 427 31. Diab AA, Moustafa IM. Lumbar lordosis rehabilitation for pain and lumbar segmental motion  
428 in chronic mechanical low back pain: a randomized trial. *J Manipulative Physiol Ther*.  
429 2012;35(4):246-253.
- 430 32. Gale GD, Rothbart PJ, Li Y. Infrared therapy for chronic low back pain: a randomized,  
431 controlled trial. *Pain Res Manag*. 2006;11(3):193-196.
- 432 33. Morone N, Rollman B, Moore C, Li Q, Weiner D. A Mind-Body Program for Older Adults  
433 with Chronic Low Back Pain: Results of a Pilot Study. *Pain medicine (Malden, Mass)*.  
434 2009;10:1395-1407.
- 435 34. Mbada CE, Idowu OA, Ogunjimi OR, et al. Cross-cultural Adaptation, Reliability, and  
436 Validity of the Yoruba Version of the Roland-Morris Disability Questionnaire. *Spine*.  
437 2017;42(7):497-503.
- 438 35. Yi H, Ji X, Wei X, et al. Reliability and validity of simplified Chinese version of  
439 Roland-Morris questionnaire in evaluating rural and urban patients with low back pain. *PLoS  
440 One*. 2012;7(1):e30807.
- 441 36. Zhang Y, Qu B, Lun SS, Guo Y, Liu J. The 36-item short form health survey: reliability and  
442 validity in Chinese medical students. *Int J Med Sci*. 2012;9(7):521-526.
- 443 37. Samakouri M, Bouhos G, Kadoglou M, Giantzelidou A, Tsolaki K, Livaditis M.  
444 Standardization of the Greek version of Zung's Self-rating Anxiety Scale (SAS). *Psychiatrike*.  
445 2012;23(3):212-220.
- 446 38. Hita-Contreras F, Martinez-Lopez E, Latorre-Roman PA, Garrido F, Santos MA,  
447 Martinez-Amat A. Reliability and validity of the Spanish version of the Pittsburgh Sleep  
448 Quality Index (PSQI) in patients with fibromyalgia. *Rheumatol Int*. 2014;34(7):929-936.
- 449 39. Zhou XY, Xu XM, Wang F, et al. Validations and psychological properties of a simplified  
450 Chinese version of pain anxiety symptoms scale (SC-PASS). *Medicine*. 2017;96(10):e5626.
- 451 40. Aguiar AS, Bataglion C, Visscher CM, Bevilaqua Grossi D, Chaves TC. Cross-cultural  
452 adaptation, reliability and construct validity of the Tampa scale for kinesiophobia for  
453 temporomandibular disorders (TSK/TMD-Br) into Brazilian Portuguese. *Journal of oral*

- 454 *rehabilitation*. 2017;44(7):500-510.
- 455 41. Wei X, Xu X, Zhao Y, Hu W, Bai Y, Li M. The Chinese version of the Tampa Scale for  
 456 Kinesiophobia was cross-culturally adapted and validated in patients with low back pain. *J*  
 457 *Clin Epidemiol*. 2015;68(10):1205-1212.
- 458 42. Fishbain DA, Gao J, Lewis JE, Zhang L. At Completion of a Multidisciplinary Treatment  
 459 Program, Are Psychophysical Variables Associated with a VAS Improvement of 30% or More,  
 460 a Minimal Clinically Important Difference, or an Absolute VAS Score Improvement of 1.5 cm  
 461 or More? *Pain medicine (Malden, Mass)*. 2016;17(4):781-789.
- 462 43. Grant S, Pedersen ER, Osilla KC, Kulesza M, D'Amico EJ. It is time to develop appropriate  
 463 tools for assessing minimal clinically important differences, performance bias and quality of  
 464 evidence in reviews of behavioral interventions. *Addiction (Abingdon, England)*.  
 465 2016;111(9):1533-1535.
- 466 44. Lee MK, Yost KJ, McDonald JS, Dougherty RW, Vine RL, Kallmes DF. Item response theory  
 467 analysis to evaluate reliability and minimal clinically important change of the Roland-Morris  
 468 Disability Questionnaire in patients with severe disability due to back pain from vertebral  
 469 compression fractures. *Spine J*. 2017;17(6):821-829.
- 470 45. Ostelo RW, Deyo RA, Stratford P, et al. Interpreting change scores for pain and functional  
 471 status in low back pain: towards international consensus regarding minimal important change.  
 472 *Spine*. 2008;33(1):90-94.
- 473 46. Evans R, Bronfort G, Maiers M, Schulz C, Hartvigsen J. "I know it's changed": a  
 474 mixed-methods study of the meaning of Global Perceived Effect in chronic neck pain patients.  
 475 *European spine journal : official publication of the European Spine Society, the European*  
 476 *Spinal Deformity Society, and the European Section of the Cervical Spine Research Society*.  
 477 2014;23(4):888-897.
- 478 47. Kamper SJ, Ostelo RW, Knol DL, Maher CG, de Vet HC, Hancock MJ. Global Perceived  
 479 Effect scales provided reliable assessments of health transition in people with musculoskeletal  
 480 disorders, but ratings are strongly influenced by current status. *J Clin Epidemiol*.  
 481 2010;63(7):760-766.e761.
- 482 48. Costantino C, Romiti D. Effectiveness of Back School program versus hydrotherapy in elderly  
 483 patients with chronic non-specific low back pain: a randomized clinical trial. *Acta Biomed*.  
 484 2014;85(3):52-61.
- 485 49. Lamb SE, Hansen Z, Lall R, et al. Group cognitive behavioural treatment for low-back pain in  
 486 primary care: a randomised controlled trial and cost-effectiveness analysis. *Lancet (London,*  
 487 *England)*. 2010;375(9718):916-923.
- 488 50. Huber M, van Vliet M, Giezenberg M, et al. Towards a 'patient-centred' operationalisation of  
 489 the new dynamic concept of health: a mixed methods study. *BMJ open*. 2016;6(1):e010091.
- 490 51. Auvinen J, Tammelin T, Taimela S, Zitting P, Karppinen J. Associations of physical activity  
 491 and inactivity with low back pain in adolescents. *Scandinavian journal of medicine & science*  
 492 *in sports*. 2008;18(2):188-194.
- 493 52. Backhausen MG, Tabor A, Albert H, Rosthoj S, Damm P, Hegaard HK. The effects of an  
 494 unsupervised water exercise program on low back pain and sick leave among healthy pregnant  
 495 women - A randomised controlled trial. *PLoS One*. 2017;12(9):e0182114.
- 496 53. Lambert BS, Greene NP, Carradine AT, et al. Aquatic treadmill training reduces blood pressure  
 497 reactivity to physical stress. *Medicine and science in sports and exercise*. 2014;46(4):809-816.

- 498 54. Smith MA, Lyle MA. Chronic exercise decreases sensitivity to mu opioids in female rats:  
499 correlation with exercise output. *Pharmacology, biochemistry, and behavior*.  
500 2006;85(1):12-22.
- 501 55. Koes B. Management of low back pain in primary care: a new approach. *Lancet (London,*  
502 *England)*. 2011;378(9802):1530-1532.
- 503 56. Silvers WM, Rutledge ER, Dolny DG. Peak cardiorespiratory responses during aquatic and  
504 land treadmill exercise. *Medicine and science in sports and exercise*. 2007;39(6):969-975.  
505

Supplement 1: Table 1 Protocol of Therapeutic Aquatic Exercise

| Activity/E exercise | Time (min) or REPs                      | Explanation                                                                                                                                                                                                                              | Modifications (easy/hard) | diagram                                                                               | Equipment |
|---------------------|-----------------------------------------|------------------------------------------------------------------------------------------------------------------------------------------------------------------------------------------------------------------------------------------|---------------------------|---------------------------------------------------------------------------------------|-----------|
| Warm-up (10 min)    |                                         |                                                                                                                                                                                                                                          |                           |                                                                                       |           |
| Dynamic drafting    | 4min,<br>continuously<br>30 s × 8 parts | Stretching the muscles of the neck, shoulder, back, hip, knee, and ankle slowly and repeatedly to increase the range of motion of the entire joint.                                                                                      | Increase speed            |    | /         |
| Pool walking        | 4 min,<br>continuously                  | Walking in the water with tightening abdomen and straight back, and the heel touchdown before the front foot.                                                                                                                            | Increase speed            |   | /         |
| High leg kicks      | 1 min,<br>continuously                  | Raising the legs alternately with fast rhythm. The body should be in the same position, and the upper body is upright. The heel of the supporting leg must be off the ground.                                                            | Increase speed            |  | /         |
| Jumping jacks       | 1 min,<br>continuously                  | Standing in chest-level water with your feet together and your arms by your side. Jumping with two legs outward and arms lifted up to the head simultaneously, then bring the two legs together and put down the arms back to your side. | Increase speed            |  | /         |

Core exercise (40 min)

|                                |                                                                                 |                                                                                                                                                                                                                              |                                              |                                                                                       |                            |
|--------------------------------|---------------------------------------------------------------------------------|------------------------------------------------------------------------------------------------------------------------------------------------------------------------------------------------------------------------------|----------------------------------------------|---------------------------------------------------------------------------------------|----------------------------|
| <p>Abdominal bracing</p>       | <p>5 min<br/>15 s × 20reps<br/>Maintain 10 s,<br/>rest 5 s</p>                  | <p>Standing still with your back in a relaxed neutral spine position, gently contracting your abdominal muscles to move the rib toward the hip and the navel to the spine.</p>                                               | <p>Increase maintenance time</p>             |    | <p>/</p>                   |
| <p>Vertical downward press</p> | <p>5 min<br/>15 s × 20 reps<br/>Maintain 10 s,<br/>rest 5 s</p>                 | <p>Standing upright with feet shoulder-width apart and toes forward, pressing the dumbbell vertical downward against the water with two hands. Then, the dumbbell was allowed to return to the surface slowly</p>            | <p>Increase maintenance time, resistance</p> |   | <p>Dumbbell, kickboard</p> |
| <p>Lateral downward press</p>  | <p>5min<br/>15 s × 20 reps<br/>Maintain 10 s,<br/>rest 5 s</p>                  | <p>Standing upright with the feet shoulder-width apart and toes forward, pressing the kickboard lateral downward against the water with the two hands.</p>                                                                   | <p>Increase maintenance time, resistance</p> |  | <p>Dumbbell, kickboard</p> |
| <p>Slant downward press</p>    | <p>10min<br/>30 s × 20 reps<br/>×2direction<br/>Maintain20 s,<br/>rest 10 s</p> | <p>Standing upright with feet shoulder-width apart and toes forward, holding the dumbbell with two hands in the direction of one shoulder, then pressing it slant downward against the water to the hip in another side.</p> | <p>Increase speed and repetitions</p>        |  | <p>Dumbbell, kickboard</p> |

|                       |                                                             |                                                                                                                                                                                                                                                                                                                                    |                                            |                                                                                       |                     |
|-----------------------|-------------------------------------------------------------|------------------------------------------------------------------------------------------------------------------------------------------------------------------------------------------------------------------------------------------------------------------------------------------------------------------------------------|--------------------------------------------|---------------------------------------------------------------------------------------|---------------------|
| Straight leg pressing | 5 min<br>30 s × 20 reps<br>Maintain 20 s, rest 10 s         | Standing with your back to the side of the pool in chest-high water, placing your arms on the edge of the pool for stability. Raising your two legs up together with straight knee joint, then return to standing position with two legs pressing against water.                                                                   | Increase speed and repetitions, resistance |    | Dumbbell, kickboard |
| Water treading        | 5 mins<br>30 s × 20 reps<br>Maintain 20 s, rest 10 s        | Standing in chin-high water with your feet held stationary on the top of a kickboard, paddle your arms to keep balance and kick your legs as your lower body rises off the ground and your knees to the chest. Then, extend your hips and knees fully to push the board reach the floor                                            | Increase speed, maintain time              |   | kickboard           |
| Deep water running    | 5 min<br>Continuously run 50–100 m                          | A swim belt is needed to perform the exercise. Keep your body straight up in the water with your shoulders back and your head and eyes looking at the horizon. Pull your knees up as high as hip height, and slightly point your toes. Swing your arms with reciprocal boxing movements. The body will be propelled slowly forward | Increase speed and running mileage         |  | Swim belt           |
| Cool-down (10min)     |                                                             |                                                                                                                                                                                                                                                                                                                                    |                                            |                                                                                       |                     |
| Static stretching     | 5 min<br>20 s × 3 reps × 5 parts<br>Maintain 15 s, rest 5 s | Slowly lengthen the muscles of the shoulders, back, abdomen, and thighs, shins respectively, and keep them in a comfortable position for 15–20 s.                                                                                                                                                                                  | /                                          |  | /                   |

|            |                       |                                                                                                                                                                                                                    |                     |                                                                                     |                      |
|------------|-----------------------|--------------------------------------------------------------------------------------------------------------------------------------------------------------------------------------------------------------------|---------------------|-------------------------------------------------------------------------------------|----------------------|
| Back float | 3 min<br>Continuously | Wearing a swim belt, lie as parallel to the ground as possible according to the instructions of the experimenter. Assistance given by the experimenter will be reduced gradually, and finally stop the assistance. | Decrease assistance |  | Swim belt, kickboard |
|------------|-----------------------|--------------------------------------------------------------------------------------------------------------------------------------------------------------------------------------------------------------------|---------------------|-------------------------------------------------------------------------------------|----------------------|



Supplement 1: Table 2 demographics and baseline characteristics of all participants

| Characteristic                                              | therapeutic aquatic exercise | physical therapy modalities |
|-------------------------------------------------------------|------------------------------|-----------------------------|
| Mean age (SD), y                                            | ×                            | ×                           |
| Sex-female, N (%)                                           | ×                            | ×                           |
| Mean height (SD), m                                         | ×                            | ×                           |
| Mean weight (SD), kg                                        | ×                            | ×                           |
| Mean BMI(SD), kg/m <sup>2</sup>                             | ×                            | ×                           |
| <b>Education levels</b>                                     |                              |                             |
| Illiteracy, N (%)                                           | ×                            | ×                           |
| Primary school, N (%)                                       | ×                            | ×                           |
| Junior middle school, N (%)                                 | ×                            | ×                           |
| High school, N (%)                                          | ×                            | ×                           |
| University, N (%)                                           | ×                            | ×                           |
| Postgraduate, N (%)                                         | ×                            | ×                           |
| <b>Employment status</b>                                    |                              |                             |
| Employed part-time, No. (%)                                 | ×                            | ×                           |
| Employed full-time, No. (%)                                 | ×                            | ×                           |
| Unemployed, No. (%)                                         | ×                            | ×                           |
| Not trying to look for employment, No. (%)                  | ×                            | ×                           |
| Unable to work due to poor health, No. (%)                  |                              |                             |
| Student, No. (%)                                            | ×                            | ×                           |
| Retired, No. (%)                                            | ×                            | ×                           |
| <b>Personal monthly income, yuan</b>                        | ×                            | ×                           |
| ≥10000, No. (%)                                             | ×                            | ×                           |
| 5000-10000, No. (%)                                         |                              |                             |
| 3000-5000, No. (%)                                          | ×                            | ×                           |
| <3000, No. (%)                                              | ×                            | ×                           |
| Refused, No. (%)                                            | ×                            | ×                           |
| <b>Smoking history</b>                                      |                              |                             |
| Smoking, No. (%)                                            |                              |                             |
| Years of smoking, mean (SD), y                              | ×                            | ×                           |
| Smoking per day, mean (SD)                                  | ×                            | ×                           |
| Low back pain duration, mean (SD), y                        | ×                            | ×                           |
| Duration of first onset, mean (SD),d                        | ×                            | ×                           |
| <b>Current back pain intensity</b>                          |                              |                             |
| Most serious pain in previous week, mean NRS score (SD)     | ×                            | ×                           |
| Slightest pain in previous week, mean NRS score (SD)        | ×                            | ×                           |
| Average pain in previous week, mean NRS score (SD)          | ×                            | ×                           |
| Current pain intensity, mean NRS score (SD)                 | ×                            | ×                           |
| Work absence or reduced hours, mean (SD), h                 | ×                            | ×                           |
| Medical expenditure on back pain last year, mean (SD), yuan | ×                            | ×                           |
| <b>Medication use in previous three months</b>              |                              |                             |

|                                                      |   |   |
|------------------------------------------------------|---|---|
| No medication, No. (%)                               | × | × |
| Pain reliever, No. (%)                               | × | × |
| Adjuvant drugs, No. (%)                              | × | × |
| Drugs for other disease, No. (%)                     | × | × |
| <b>Belief that invention works</b>                   |   |   |
| Yes, No. (%)                                         | × | × |
| No, No. (%)                                          | × | × |
| Don't know, No. (%)                                  | × | × |
| <b>Expectation that invention works</b>              |   |   |
| Yes, No. (%)                                         | × | × |
| No, No. (%)                                          | × | × |
| Don't know, No. (%)                                  | × | × |
| <b>Marital status</b>                                |   |   |
| Unmarried, No. (%)                                   | × | × |
| Married, No. (%)                                     | × | × |
| Divorced, No. (%)                                    | × | × |
| Widowhood, No. (%)                                   | × | × |
| <b>Occupation</b>                                    |   |   |
| Sitting time , mean (SD), h                          | × | × |
| Standing time, mean (SD), h                          | × | × |
| Others, mean (SD), h                                 | × | × |
| <b>Physical activity</b>                             |   |   |
| <b>High intensity physical activity per week</b>     |   |   |
| < 150min per day, No. (%)                            | × | × |
| 150-300min per day, No. (%)                          | × | × |
| > 300min per day, No. (%)                            | × | × |
| <b>Moderate intensity physical activity per week</b> |   |   |
| < 75min per day, No. (%)                             | × | × |
| 75-150min per day, No. (%)                           | × | × |
| > 150min per day, No. (%)                            | × | × |
| <b>Cause of first onset</b>                          |   |   |
| Hyperactivity or improper exercise, No. (%)          | × | × |
| Sedentary lifestyle, No. (%)                         | × | × |
| Pregnancy, No. (%)                                   | × | × |
| Others, No. (%)                                      | × | × |
| <b>Site of first onset</b>                           |   |   |
| Left, No. (%)                                        | × | × |
| Right, No. (%)                                       | × | × |
| Middle, No. (%)                                      | × | × |
| Both two sides, No. (%)                              | × | × |
| Others, No. (%)                                      | × | × |
| <b>Site of current LBP</b>                           |   |   |
| Left, No. (%)                                        | × | × |

|                                                          |   |   |
|----------------------------------------------------------|---|---|
| Right, No. (%)                                           | × | × |
| Middle, No. (%)                                          | × | × |
| Both two sides, No. (%)                                  | × | × |
| Others, No. (%)                                          | × | × |
| Duration of the latest low back pain, mean (SD),d        | × | × |
| Frequency of low back pain last month, mean (SD)         | × | × |
| Duration of low back pain per day last week, mean (SD),h | × | × |
| <b>Influence of low back pain on work</b>                |   |   |
| Free, No. (%)                                            | × | × |
| mild, No. (%)                                            | × | × |
| moderate, No. (%)                                        | × | × |
| severe, No. (%)                                          | × | × |
| <b>Influence of low back pain on life</b>                |   |   |
| Free, No. (%)                                            | × | × |
| mild, No. (%)                                            | × | × |
| moderate, No. (%)                                        | × | × |
| severe, No. (%)                                          | × | × |
| <b>Pain mode in 24-hour</b>                              |   |   |
| gradually aggravate, No. (%)                             | × | × |
| gradually relieve, No. (%)                               | × | × |
| no change, No. (%)                                       | × | × |
| Others, No. (%)                                          | × | × |
| <b>Factors aggravating low back pain</b>                 |   |   |
| Sitting, No. (%)                                         | × | × |
| Standing, No. (%)                                        | × | × |
| Walking, No. (%)                                         | × | × |
| Bending, No. (%)                                         | × | × |
| Squat down, No. (%)                                      | × | × |
| Go upstairs, No. (%)                                     | × | × |
| Go downstairs, No. (%)                                   | × | × |
| Postural change, No. (%)                                 | × | × |
| Others, No. (%)                                          | × | × |
| <b>Factors to relieve low back pain</b>                  |   |   |
| Recumbent rest, No. (%)                                  | × | × |
| Sitting for rest, No. (%)                                | × | × |
| Small intensity activities, No. (%)                      | × | × |
| Others, No. (%)                                          | × | × |
| <b>Nature of pain</b>                                    |   |   |
| Soreness, No. (%)                                        | × | × |
| Distended pain, No. (%)                                  | × | × |
| Radiation pain, No. (%)                                  | × | × |
| Burning pain, No. (%)                                    | × | × |
| Needling pain, No. (%)                                   | × | × |

|                |   |   |
|----------------|---|---|
| Other, No. (%) | ✘ | ✘ |
|----------------|---|---|

SD= Standard Deviation, BMI=Body Mass Index, VAS= Visual Analogue Scale, RMDQ= Roland

Morris Disability Questionnaire

Supplement 1: Table 3 Outline of measurement time points

|                                                    | Baseline | 3 months | 6 months | 12 months |
|----------------------------------------------------|----------|----------|----------|-----------|
| numeric rating scale (NRS)                         | ✗        | ✗        | ✗        | ✗         |
| Roland Morris Disability Questionnaire (RMDQ)      | ✗        | ✗        | ✗        | ✗         |
| the Short Form (36) Health Survey                  | ✗        | ✗        | ✗        | ✗         |
| Self-Rating Anxiety Scale (SAS)                    | ✗        | ✗        | ✗        | ✗         |
| Zung Self-Rating Depression Scale (SDS)            | ✗        | ✗        | ✗        | ✗         |
| Pittsburgh Sleep Quality Index (PSQI)              | ✗        | ✗        | ✗        | ✗         |
| The Pain Anxiety Symptoms Scale (PASS)             | ✗        | ✗        | ✗        | ✗         |
| Tampa Scale for Kinesiophobia (TSK)                | ✗        | ✗        | ✗        | ✗         |
| Fear Avoidance Beliefs Questionnaire (FABQ)        | ✗        | ✗        | ✗        | ✗         |
| The Minimal Clinically Important Difference (MCID) |          | ✗        | ✗        | ✗         |
| Global Perceived Effect (GPE)                      |          | ✗        | ✗        | ✗         |
| Adverse Events                                     |          | ✗        | ✗        | ✗         |
| Recommendation                                     |          | ✗        | ✗        | ✗         |
