# Supplementary material for: Efficacy of Therapeutic Aquatic Exercise vs Physical Therapy Modalities for Patients With Chronic Low Back Pain: A Randomized Clinical Trial
Source: PubMed Central journal article supplement (PMC8742191; doi:10.1001/jamanetworkopen.2021.42069), 2022-01-07
Supplement: jamanetwopen-e2142069-s003.pdf [file jamanetwopen-e2142069-s003.pdf]

## Data Sharing Statement

Peng. Efficacy of Therapeutic Aquatic Exercise vs Physical Therapy Modalities for Patients With Chronic Low Back Pain. *JAMA Netw Open*. Published January 07, 2022.  
doi:10.1001/jamanetworkopen.2021.42069

### Data

**Data available:** No
